# Supplementary material for: Unveiling the metabolic potential of two soil-derived microbial consortia selected on wheat straw
Source: PubMed Central journal article supplement (PMC4561380; doi:10.1038/srep13845), 2015-09-07
Supplement: srep13845-s1.pdf [file srep13845-s1.pdf]

## **Unveiling the metabolic potential of two soil-derived microbial consortia selected on wheat straw**

**Diego Javier Jiménez <sup>1\*</sup>, Diego Chaves-Moreno <sup>2</sup> and Jan Dirk van Elsas <sup>1</sup>**

### **Affiliations**

<sup>1</sup> Department of Microbial Ecology, Groningen Institute for Evolutionary Life Sciences, University of Groningen.

Nijenborgh 7, 9747AG. Groningen, The Netherlands.

<sup>2</sup> Helmholtz–Centre for Infection Research, Inhoffenstr 7, 38124. Braunschweig, Germany.

**\* Corresponding author:** Diego Javier Jiménez

Phone: +31 503632191; Fax: +31 503632348; Email: [d.j.jimenez.avella@rug.nl](mailto:d.j.jimenez.avella@rug.nl)

a)

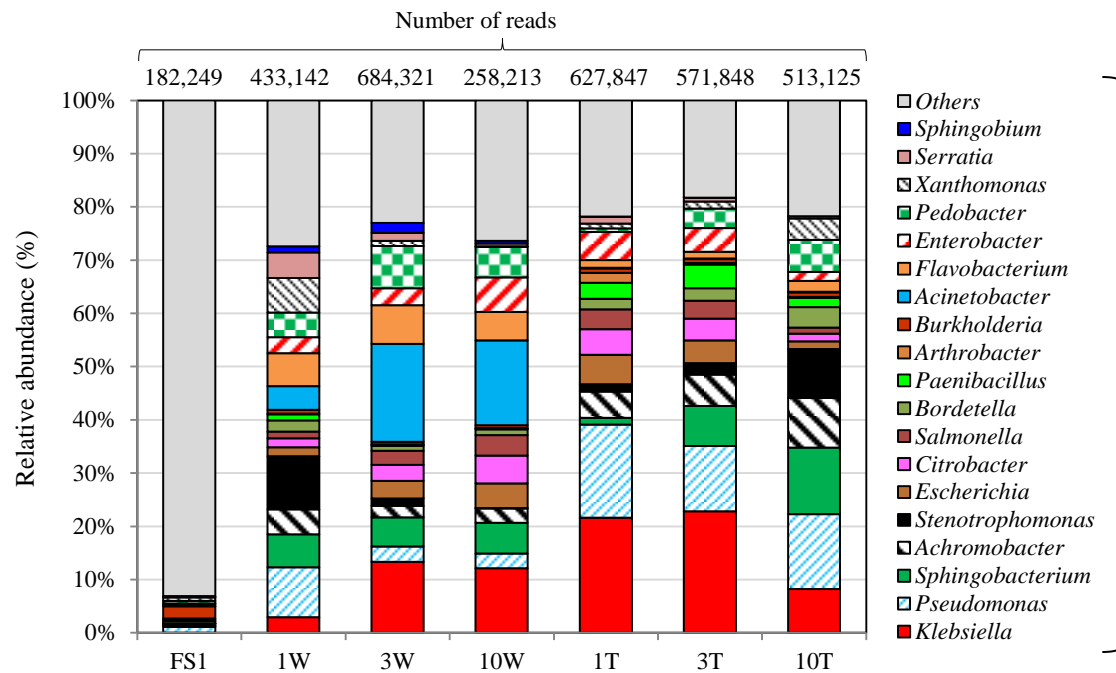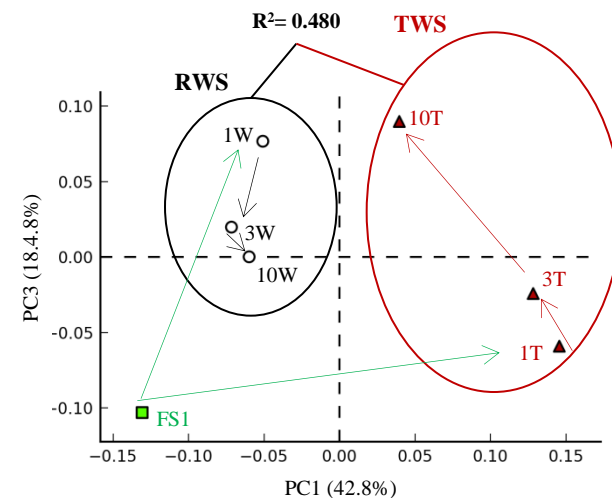

b)

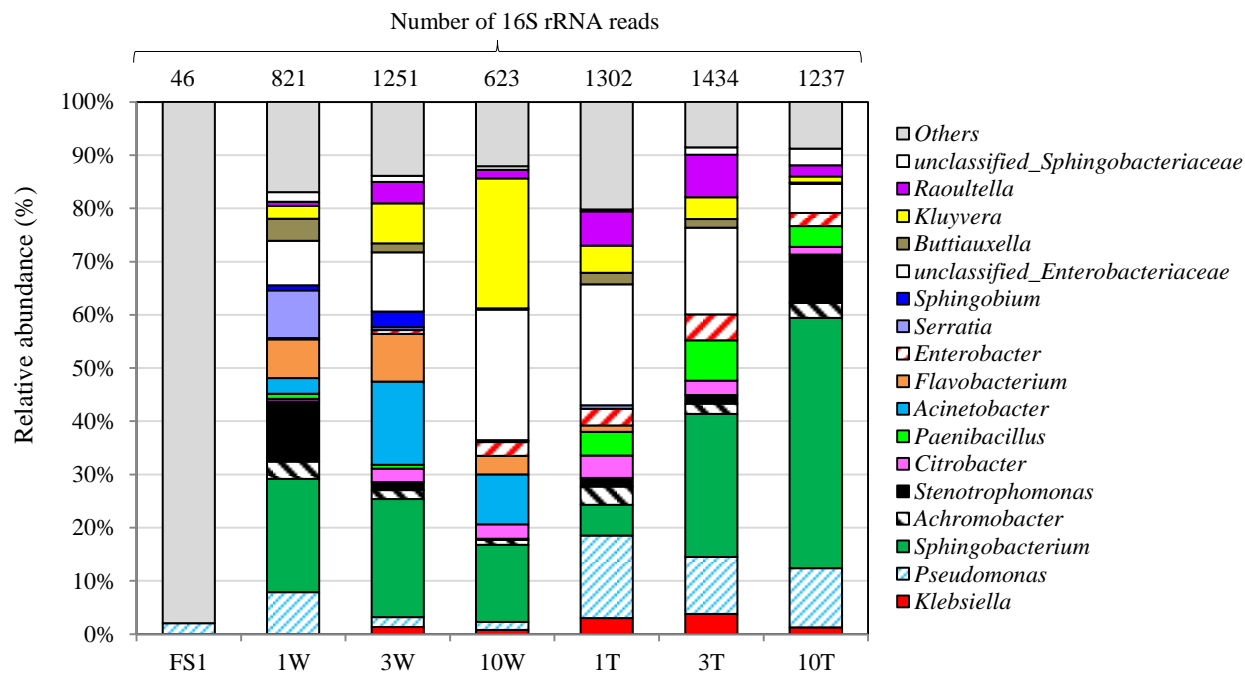

**Supplementary Fig S1.** Taxonomic profile of soil inoculum (FS1) and each metagenome that come from the three sequential transfers in RWS and TWS. **a)** Left: Taxonomic affiliation, based on protein-encoding reads (RefSeq database), of the most abundant bacterial genera in RWS and TWS samples, Right: PCA of the seven metagenomes using the classification at bacteria genus level; **b)** 16S rRNA reads classification using Classifier software

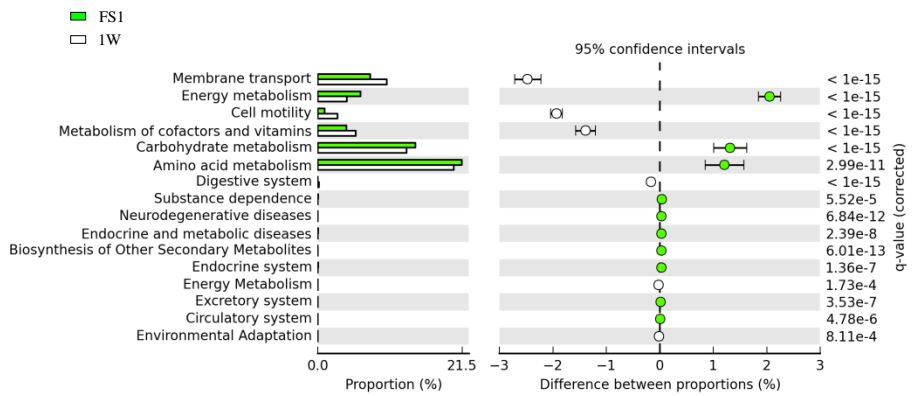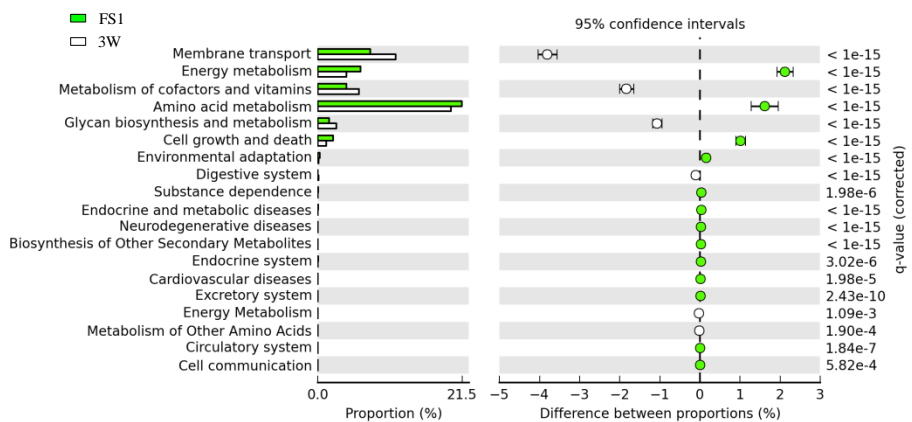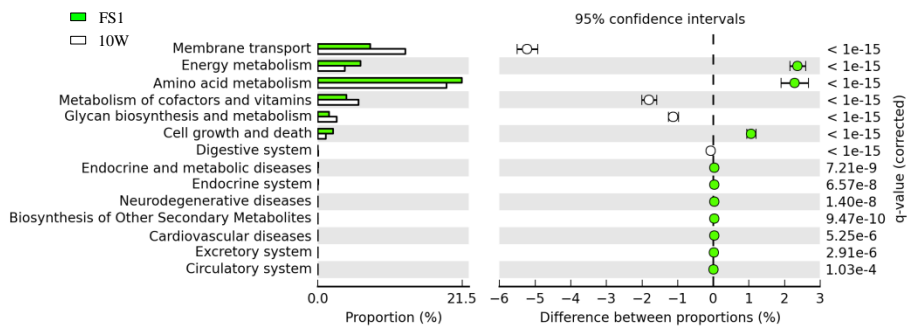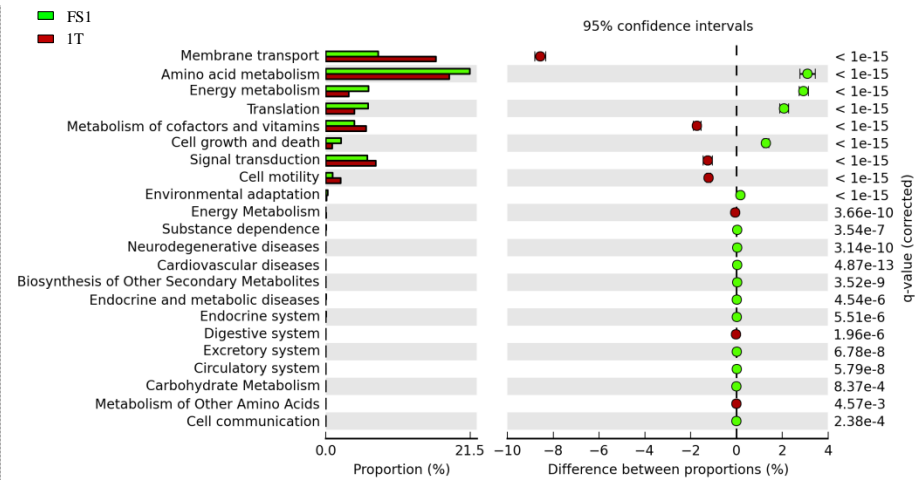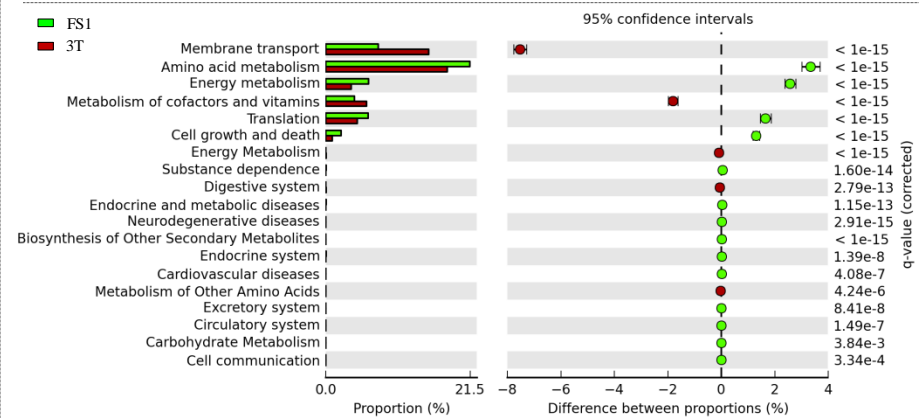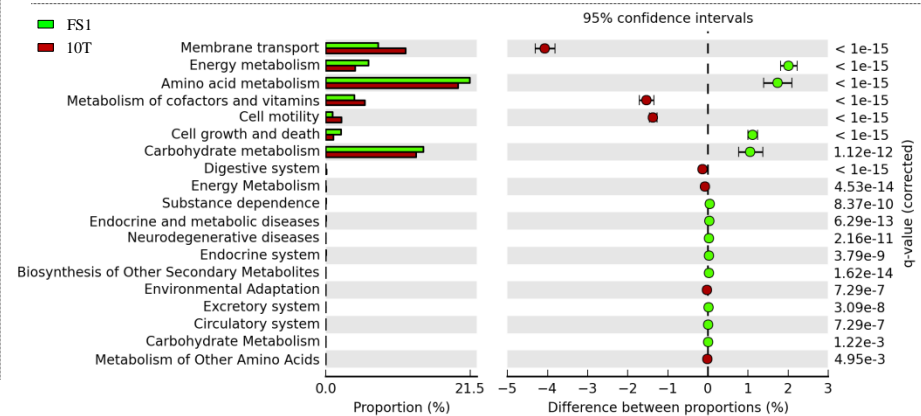

**Supplementary Fig S2.** Differentially enriched functions ( $p < 0.005$ , 95% CIs), at KEGG level 2, between the soil inoculum (FS1) and each metagenome that come from the three sequential transfers in RWS (1W, 3W and 10W) and TWS (1T, 3T and 10T).

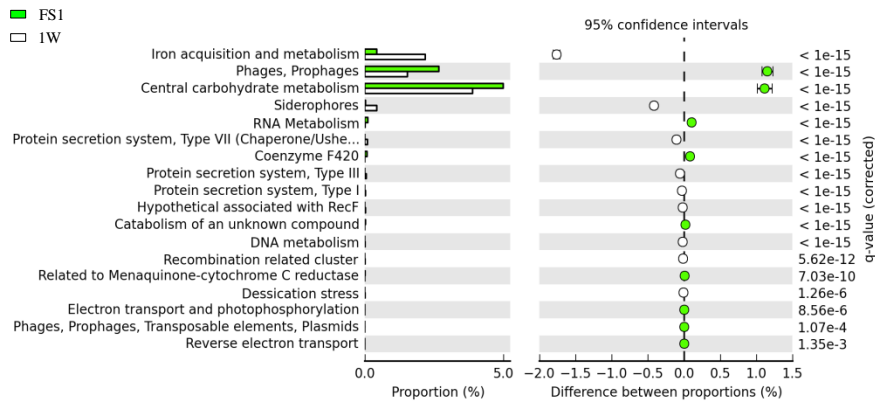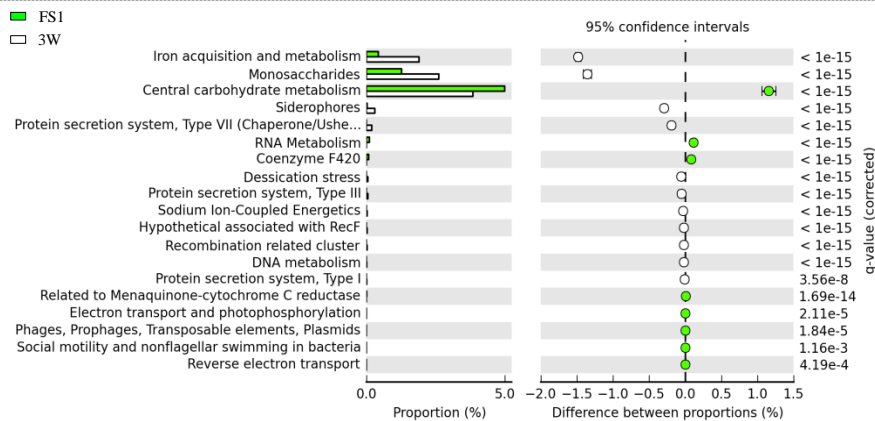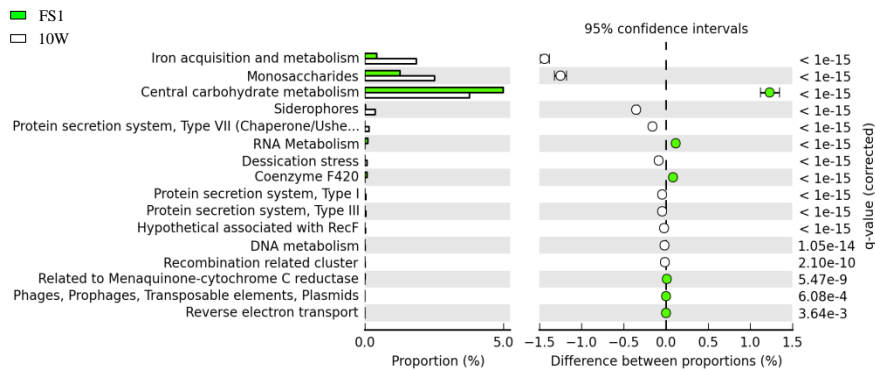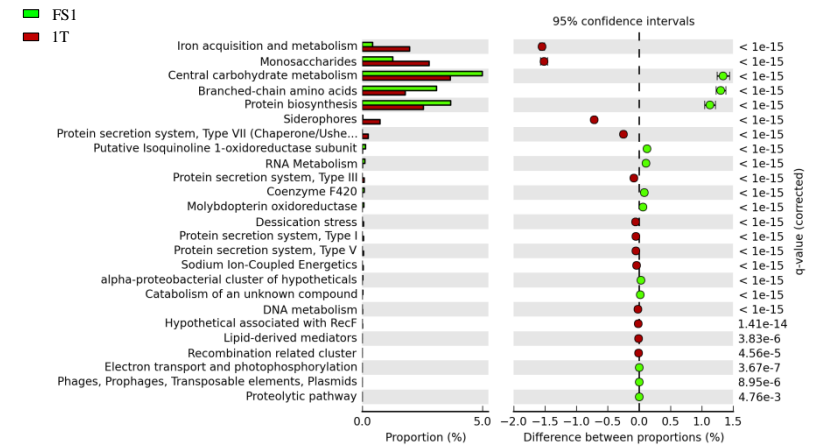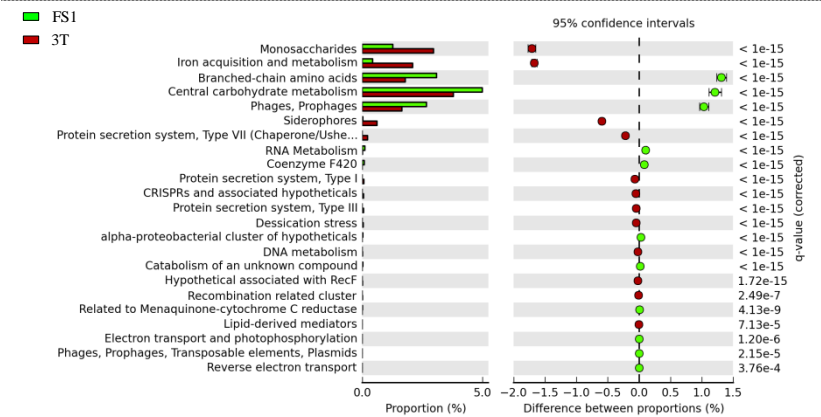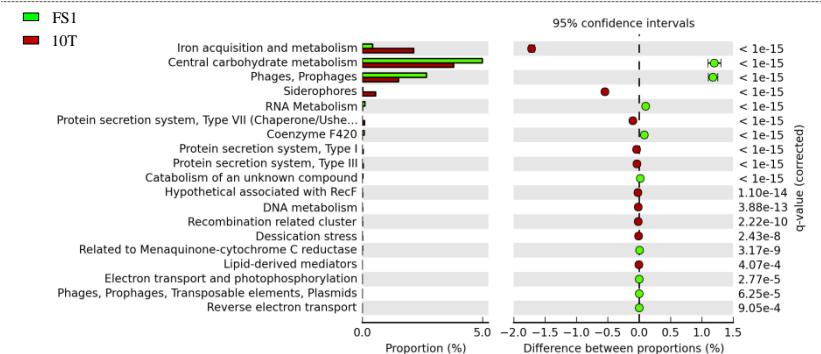

**Supplementary Fig S3.** Differentially enriched functions ( $p < 0.005$ , 95% CIs), at SEED level 2, between the soil inoculum (FS1) and each metagenome that come from the three sequential transfers in RWS (1W, 3W and 10W) and TWS (1T, 3T and 10T).

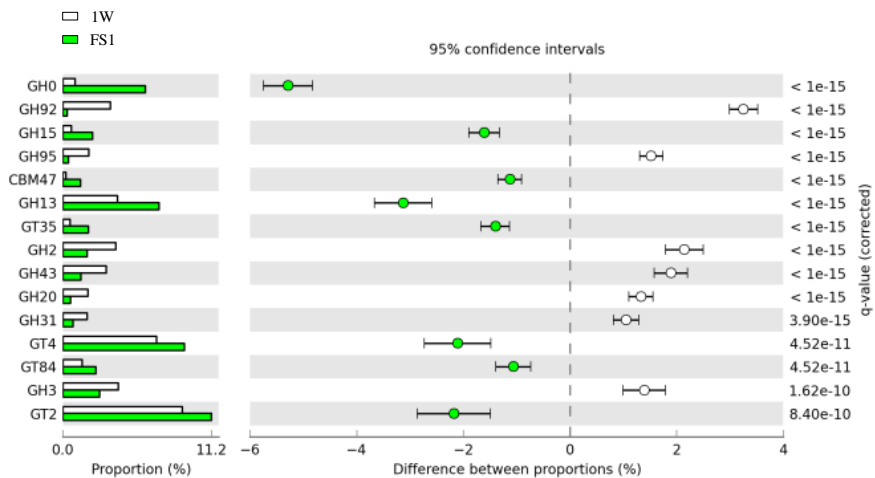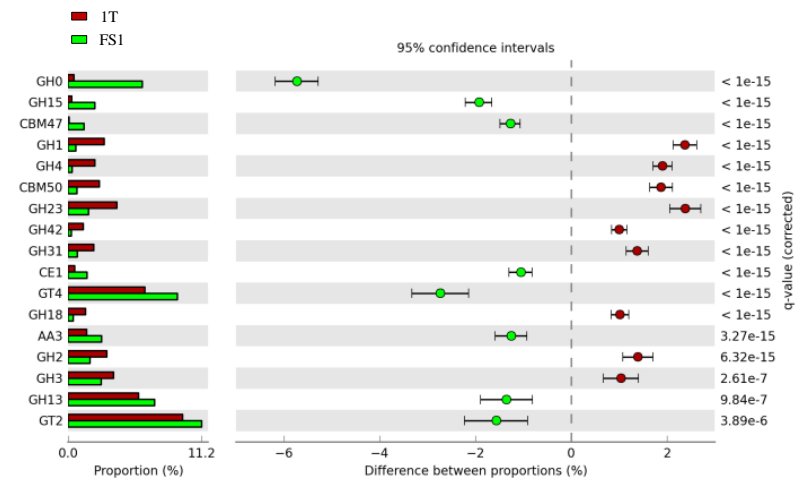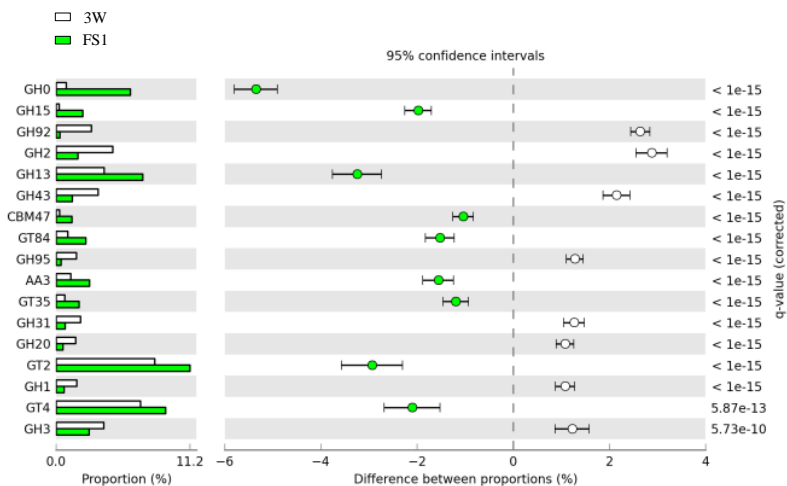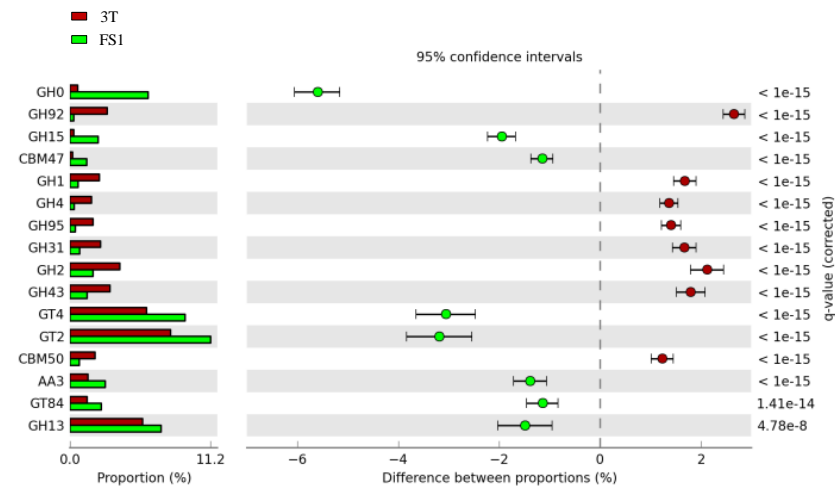

**Supplementary Fig S4.** Differentially enriched CAZy families ( $p < 0.005$ , 95% CIs) between FS1 and 1W, 3W, 1T and 3T metagenomes.
